# Supplementary material for: Cigarette Smoking by Patients With Serious Mental Illness, 1999–2016: An Increasing Disparity
Source: Atypon-hosted journal article supplement (doi:10.1176/appi.ps.201700118), 2017-09-25
Supplement: appi.ps.201700118.ds001.pdf [file appi.ps.201700118.ds001.pdf]

**Supplemental Table 1. Current medications and treatment settings of psychiatric participants**

|                                                         | Schizophrenia<br>(N=837) | Bipolar Disorder<br>(N=530) |
|---------------------------------------------------------|--------------------------|-----------------------------|
| Psychiatric medications received at time of study visit |                          |                             |
| Atypical antipsychotic                                  | 696 (83%)                | 363 (68%)                   |
| Clozapine                                               | 166 (20%)                | 5 (1%)                      |
| Olanzapine                                              | 198 (24%)                | 70 (13%)                    |
| Risperidone                                             | 223 (27%)                | 103 (19%)                   |
| Mood stabilizers                                        |                          |                             |
| Lithium                                                 | 104 (12%)                | 179 (34%)                   |
| Valproate                                               | 173 (21%)                | 170 (32%)                   |
| Anticonvulsant                                          | 346 (41%)                | 437 (82%)                   |
| Antidepressant                                          | 347 (41%)                | 224 (42%)                   |
| Treatment setting at time of study visit                |                          |                             |
| Inpatient                                               | 167 (20%)                | 315 (59%)                   |
| Day hospital                                            | 55 (7%)                  | 50 (9%)                     |
| Outpatient                                              | 615 (73%)                | 165 (31%)                   |

**Supplemental Table 2. Number of participants by diagnostic group by year of enrollment**

|             | Schizophrenia | Bipolar Disorder | Non-psychiatric controls |
|-------------|---------------|------------------|--------------------------|
| <u>Year</u> |               |                  |                          |
| 1999        | 90            | 0                | 0                        |
| 2000        | 94            | 0                | 0                        |
| 2001        | 49            | 50               | 0                        |
| 2002        | 38            | 66               | 71                       |
| 2003        | 60            | 4                | 28                       |
| 2004        | 27            | 18               | 0                        |
| 2005        | 56            | 9                | 66                       |
| 2006        | 31            | 13               | 35                       |
| 2007        | 42            | 20               | 45                       |
| 2008        | 39            | 50               | 65                       |
| 2009        | 57            | 42               | 61                       |
| 2010        | 50            | 43               | 36                       |
| 2011        | 61            | 47               | 49                       |
| 2012        | 27            | 45               | 36                       |
| 2013        | 11            | 34               | 37                       |
| 2014        | 21            | 30               | 12                       |
| 2015        | 44            | 31               | 13                       |
| 2016        | 40            | 28               | 17                       |
| Total       | 837           | 530              | 571                      |
